# Supplementary material for: Exploring Triaging and Short-Term Outcomes of Early Invasive Strategy in Non-ST Segment Elevation Acute Coronary Syndrome: A Report from Japanese Multicenter Registry
Source: PubMed Central journal article supplement (PMC7230808; doi:10.3390/jcm9041106), 2020-04-13
Supplement: jcm-09-01106-s001.pdf [file jcm-09-01106-s001.pdf]

# Supplementary materials: Exploring Triaging and Short-Term Outcomes of Early Invasive Strategy in Non-ST Segment Elevation Acute Coronary Syndrome: A Report from Japanese Multicenter Registry

Nobuhiro Ikemura, Yasuyuki Shiraishi, Mitsuaki Sawano, Ikuko Ueda, Yohei Numasawa, Shigetaka Noma, Masahiro Suzuki, Yukihiro Momiyama, Kentaro Hayashida, Shinsuke Yuasa, Hiroaki Miyata, Keiichi Fukuda and Shun Kohsaka

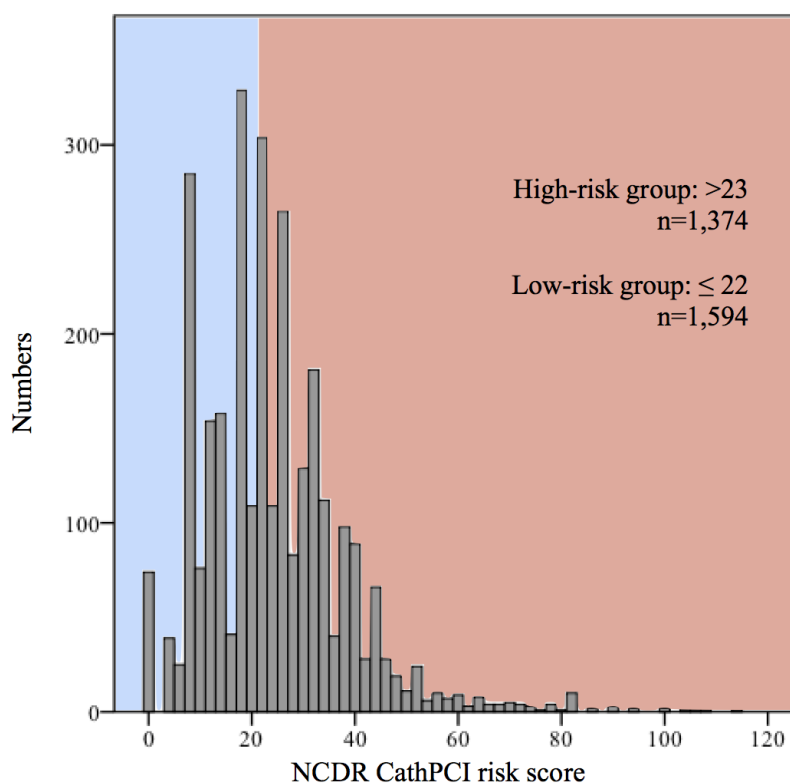

**Figure S1.** Overall distribution of the National Cardiovascular Data Registry (NCDR) CathPCI risk score.

**Table S1.** Baseline characteristics between patients with and without AKI.

| Variable              | Patients without AKI<br>(n=2,289) |      | Patients with AKI<br>(n=375) |      | P value |
|-----------------------|-----------------------------------|------|------------------------------|------|---------|
|                       | numbers                           | %    | numbers                      | %    |         |
| Male                  | 1823                              | 79.6 | 262                          | 69.9 | <0.001  |
| Age, median (Q1-Q3)   | 68 (60–76)                        |      | 75 (65–80)                   |      | <0.001  |
| BMI, median (Q1-Q3)   | 23.9 (21.8–26.3)                  |      | 23.7 (21.3–25.7)             |      | 0.91    |
| Family history of CAD | 313                               | 13.7 | 33                           | 8.9  | 0.011   |
| Current smoker        | 790                               | 34.5 | 134                          | 35.8 | 0.62    |
|                       | Past medical history              |      |                              |      |         |
| Hypertension          | 1719                              | 75.1 | 294                          | 78.4 | 0.16    |
| Diabetes mellitus     | 851                               | 37.2 | 163                          | 43.6 | 0.018   |
| Dyslipidemia          | 1529                              | 66.8 | 249                          | 66.4 | 0.88    |
| CKD                   | 805                               | 35.2 | 166                          | 44.3 | <0.001  |

|                                        |                  |                  |        |
|----------------------------------------|------------------|------------------|--------|
| eGFR, median (Q1-Q3)                   | 71.7 (54.3–94.7) | 60.3 (37.3–93.5) | 0.011  |
| PAD                                    | 137              | 6.0              | 21     |
| COPD                                   | 80               | 3.5              | 14     |
| CABG                                   | 3.7              | 0.81             |        |
| Prior heart failure                    | 109              | 4.8              | 39     |
| Prior MI                               | 413              | 18.0             | 64     |
| Prior PCI/CABG                         | 686              | 30.0             | 82     |
|                                        | 21.9             | 0.001            |        |
| Situation at arrival                   |                  |                  |        |
| NSTEMI                                 | 1003             | 43.8             | 230    |
| Unstable angina                        | 1286             | 56.2             | 145    |
| Heart failure                          | 207              | 9.0              | 85     |
| NYHA 3 or 4                            | 118              | 5.2              | 57     |
| EF, median (Q1-Q3)                     | 63 (55–70)       | 60 (45–67)       | <0.001 |
| EF <40%                                | 92               | 4.0              | 34     |
| Cardiogenic shock                      | 47               | 2.1              | 24     |
| CPA                                    | 37               | 1.6              | 15     |
| Elevated cardiac troponin              | 729              | 31.8             | 180    |
| NCDR CathPC risk score, median (Q1-Q3) | 22 (14–30)       | 28 (20–39)       | <0.001 |
| NCDR CathPCI risk score, mean, (SD)    | 24.3 (14.1)      | 21.9 (12.7)      |        |
| Procedure characteristics              |                  |                  |        |
| Femoral approach                       | 1161             | 50.8             | 249    |
| Use of IABP                            | 111              | 4.8              | 63     |
| Use of VA-ECMO                         | 9                | 0.4              | 8      |
| LMT lesion                             | 85               | 3.7              | 20     |
| LAD lesion                             | 1178             | 51.5             | 198    |
| LCX lesion                             | 581              | 25.4             | 128    |
| RCA lesion                             | 660              | 28.8             | 108    |
| Multivessel PCI                        | 211              | 9.2              | 70     |
| Fluoroscopy time, min, median, (Q1-Q3) | 23.4 (15.5–36.0) | 27.0 (18.2–41.0) | <0.001 |
| Contrast volume, ml median, (Q1-Q3)    | 156 (125–200)    | 170 (125–220)    | 0.034  |

Abbreviations: EIS, early invasive strategy; PCI, percutaneous coronary intervention; BMI, body mass index; CAD, coronary arterial disease; CKD, chronic kidney disease (eGFR<60 ml/min/1.73m<sup>2</sup>); eGFR, estimated glomerular filtration rate; HD, hemodialysis; MI, myocardial infarction; PAD, peripheral artery disease; COPD, chronic obstructive pulmonary disease; CABG, coronary artery bypass grafting; NSTEMI, non-ST elevation myocardial infarction; NYHA, New York Heart Association classification; EF, ejection fraction; CPA, cardiopulmonary arrest; NCDR, National Cardiovascular Data Registry; IABP, Intra-aortic balloon pump; VA-ECMO, veno-arterial Extracorporeal membrane oxygenation; LMT, left main trunk; LAD, left anterior descending; LCX, left circumflex; RCA, right coronary artery; Q, quartile.

**Table S2.** The results of logistic regression models evaluating whether an early invasive strategy was independently associated with an in-hospital mortality.

|                           | Adjusted OR | 95% confidence interval |             | P value |
|---------------------------|-------------|-------------------------|-------------|---------|
|                           |             | Lower limit             | Upper limit |         |
| Early invasive strategy   | <b>0.99</b> | 0.43                    | 2.29        | 0.98    |
| Male (vs female)          | 0.83        | 0.42                    | 1.65        | 0.60    |
| Age (≥75 years old)       | 1.45        | 0.69                    | 3.04        | 0.33    |
| Prior heart failure       | 2.70        | 1.18                    | 6.13        | 0.02    |
| Diabetes mellitus         | 1.28        | 0.69                    | 2.39        | 0.43    |
| Peripheral artery disease | 1.19        | 0.49                    | 2.85        | 0.70    |
| Chronic kidney disease*   | 4.07        | 1.78                    | 9.28        | <0.001  |
| NYHA 3 or 4               | 1.53        | 0.60                    | 3.92        | 0.37    |
| Elevated cardiac troponin | 2.75        | 1.46                    | 5.17        | 0.00    |
| Prior PCI/CABG            | 1.09        | 0.56                    | 2.13        | 0.79    |

|                       |      |      |      |        |
|-----------------------|------|------|------|--------|
| Cardiogenic shock/CPA | 26.9 | 13.6 | 53.1 | <0.001 |
|-----------------------|------|------|------|--------|

\*: estimated glomerular filtration rate <60 ml/min/1.73m<sup>2</sup>. **Abbreviations:** OR, odds ratio; NYHA, New York Heart Association classification; PCI, percutaneous coronary intervention; CABG, coronary artery bypass grafting; CPA, cardiopulmonary arrest.

**Table S3.** The results of logistic regression models evaluating whether an early invasive strategy was independently associated with a bleeding complication after PCI.

|                           | Adjusted OR | 95% confidence interval |             | P value |
|---------------------------|-------------|-------------------------|-------------|---------|
|                           |             | Lower limit             | Upper limit |         |
| Early invasive strategy   | 0.91        | 0.52                    | 1.58        | 0.72    |
| Male (vs female)          | 0.45        | 0.29                    | 0.71        | 0.001   |
| Age (≥75 years old)       | 0.93        | 0.58                    | 1.49        | 0.76    |
| Prior heart failure       | 1.89        | 1.08                    | 3.33        | 0.026   |
| Diabetes mellitus         | 1.12        | 0.73                    | 1.72        | 0.59    |
| Peripheral artery disease | 0.80        | 0.38                    | 1.72        | 0.57    |
| Chronic kidney disease*   | 2.24        | 1.36                    | 3.71        | 0.002   |
| NYHA 3 or 4               | 2.39        | 1.34                    | 4.26        | 0.003   |
| Elevated cardiac troponin | 1.65        | 1.08                    | 2.50        | 0.019   |
| Prior PCI/CABG            | 0.77        | 0.47                    | 1.25        | 0.28    |
| Cardiogenic shock/CPA     | 6.49        | 3.51                    | 11.99       | <0.001  |

\*: estimated glomerular filtration rate <60 ml/min/1.73m<sup>2</sup>. **Abbreviations:** OR, odds ratio; NYHA, New York Heart Association classification; PCI, percutaneous coronary intervention; CABG, coronary artery bypass grafting; CPA, cardiopulmonary arrest. .
